# Supplementary material
Source: PubMed Central journal article supplement (PMC7110808)
Supplement: mmc1.pdf [file mmc1.pdf]

## Supplementary Material for Seasonality of respiratory viruses causing hospitalizations for acute respiratory infections in children in Nha Trang, Vietnam

Benjamin M Althouse, Stefan Flasche, Le Nhat Minh, Dinh Vu Thiem, Masahiro Hashizume, Koya Ariyoshi, Dang Duc Ang, Gail L. Rodgers, Keith P. Klugman, Hao Hu, Lay-Myint Yoshida

### Additional Viruses

Table 1 shows the counts of all viruses in the study and Figure S1 the results of the Poisson regression.

|       | ADV    | HBoV | CoV    | HMPV   | HPIV1  | HPIV2  | HPIV3  | HPIV4  | HRV     | Flu A   | Flu B  | RSV     | Total  |
|-------|--------|------|--------|--------|--------|--------|--------|--------|---------|---------|--------|---------|--------|
| 2007  | 21     | 9    | 0      | 28     | 1      | 2      | 19     | 0      | 137     | 84      | 1      | 149     | 451    |
| 2008  | 15     | 4    | 0      | 10     | 10     | 2      | 10     | 1      | 134     | 51      | 8      | 85      | 330    |
| 2009  | 20     | 13   | 0      | 1      | 5      | 3      | 9      | 1      | 129     | 74      | 10     | 68      | 333    |
| 2010  | 12     | 1    | 0      | 2      | 20     | 4      | 4      | 0      | 95      | 25      | 24     | 84      | 271    |
| 2011  | 13     | 3    | 0      | 24     | 2      | 0      | 17     | 1      | 61      | 37      | 8      | 69      | 235    |
| 2012  | 6      | 4    | 1      | 7      | 2      | 1      | 12     | 0      | 13      | 11      | 19     | 0       | 76     |
| Total | 87     | 34   | 1      | 72     | 40     | 12     | 71     | 3      | 569     | 282     | 70     | 455     | 1696   |
| (%)   | (5.1%) | (2%) | (0.1%) | (4.2%) | (2.4%) | (0.7%) | (4.2%) | (0.2%) | (33.5%) | (16.6%) | (4.1%) | (26.8%) | (100%) |

Table 1: **Summary of viral hospitalizations over the study period.** Table shows counts of viral detections for Adenovirus (ADV), Bocavirus (HBoV), Coronavirus (CoV), Human metapneumovirus (HMPV), H. parainfluenza 1 (HPIV1), H. parainfluenza 2 (HPIV2), H. parainfluenza 3 (HPIV3), H. parainfluenza 4 (HPIV4), Influenza A, Influenza B, Rhinovirus (HRV), Respiratory syntitial virus (RSV).

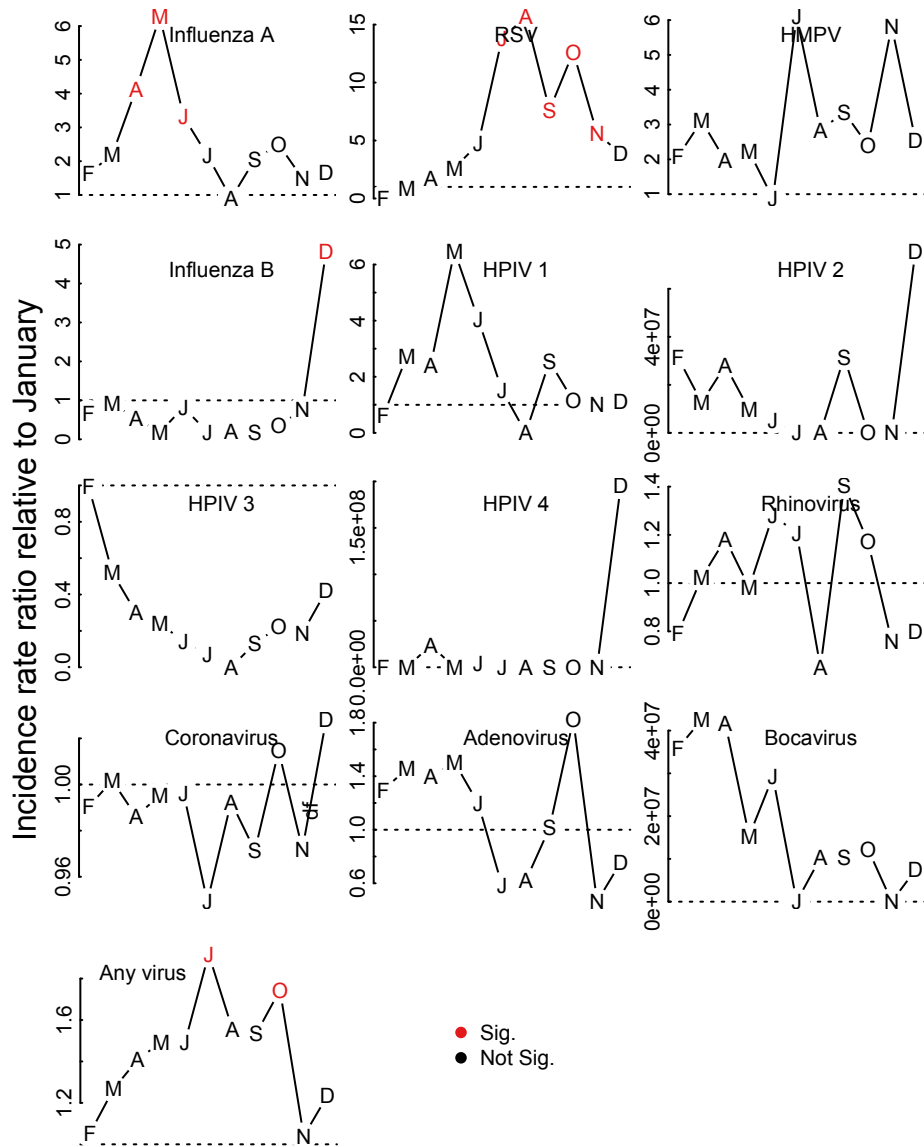

Figure S1: **Seasonality of common respiratory viruses in Nha Trang, Vietnam.** Figure shows model-adjusted incidence rate ratios for all viruses and month of year as compared to January. Red months indicates statistically significant deviations from January.

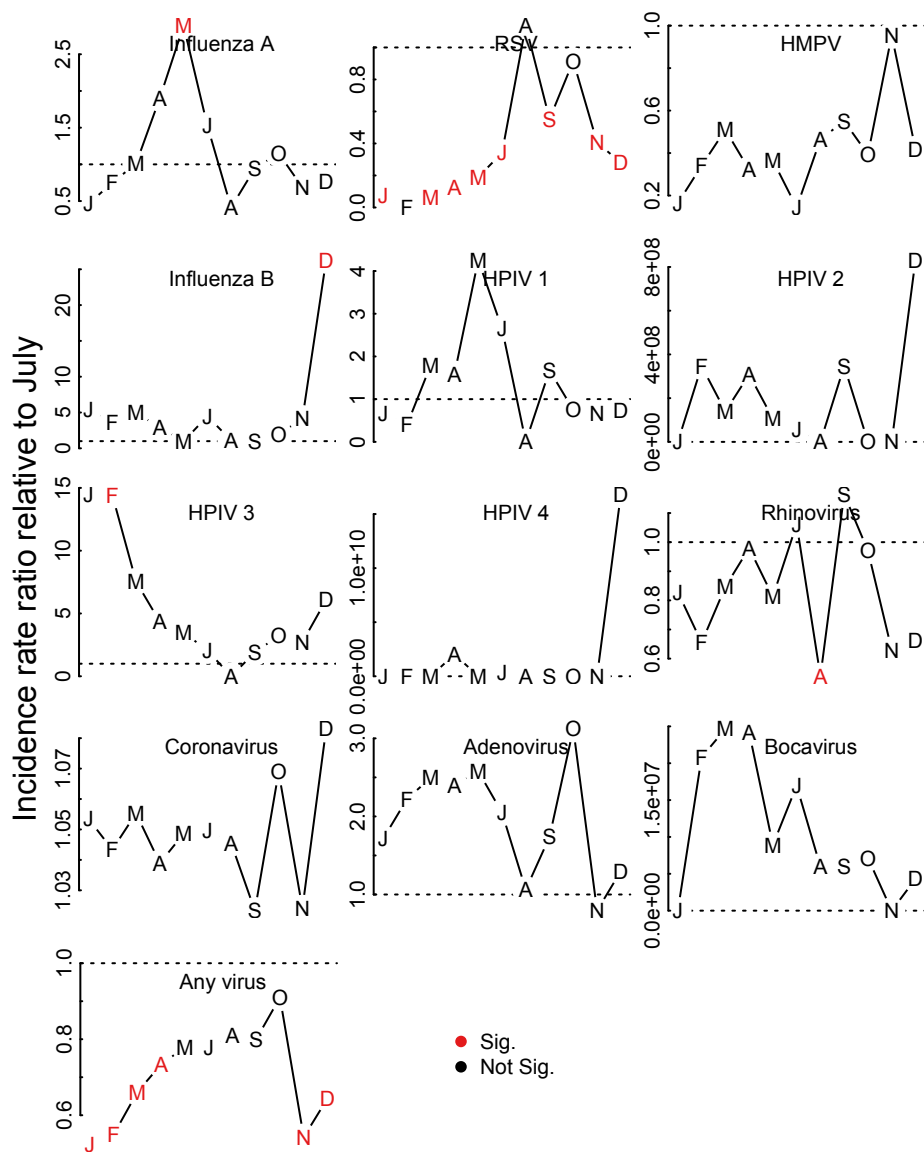

Figure S2: **Poisson regression results with July as the reference category.** Figure is identical to Figure S1 but with July as the reference category instead of January. Red months indicates statistically significant deviations from July.

## Weather

Figure S3 shows the weather over the study period (highlighted in blue) and in the 5 years before and after. Similar patterns are seen across the time period.

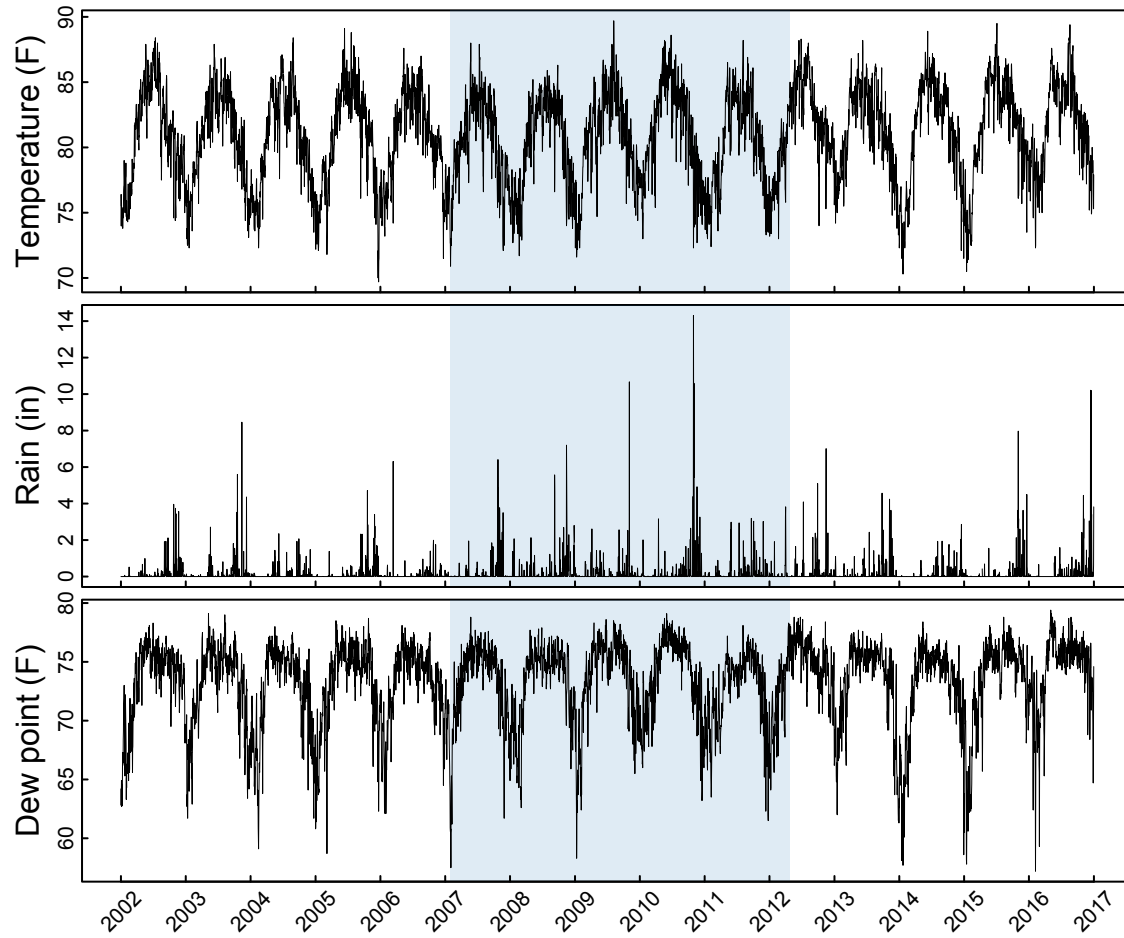

Figure S3: **Wether dynamics in Nha Trang, Vietnam.** Figure shows the weather variables before, during, and after the study period. We see stable dynamics in weather patterns.

## Logistic regressions

A series of logistic regression models were fit to assess seasonality. Outcomes were detection of a virus by PCR (yes/no) with month as the main predictor, adjusted for weather, commune of residence, age, sex, smoking indoors, socioeconomic status (SES), and calendar year. We fit 5 separate models and compared fit using Akaike’s information criterion (AIC):

$$Y_{\text{virus detection}} = \text{month} \quad (1)$$

$$Y_{\text{virus detection}} = \text{month} + \text{commune} + \text{age} + \text{sex} + \text{smoke} + \text{SES} + \text{Cal. year} \quad (2)$$

$$Y_{\text{virus detection}} = \text{month} + \text{commune} + \text{age} + \text{sex} + \text{smoke} + \text{SES} + \text{Cal. year} + \text{rain}(t_0) + \text{temperature}(t_0) + \text{dew point}(t_0) \quad (3)$$

$$Y_{\text{virus detection}} = \text{month} + \text{commune} + \text{age} + \text{sex} + \text{smoke} + \text{SES} + \text{Cal. year} + \text{rain}(t_{-7 \text{ to } -1}) + \text{temperature}(t_{-7 \text{ to } -1}) + \text{dew point}(t_{-7 \text{ to } -1}) \quad (4)$$

$$Y_{\text{virus detection}} = \text{month} + \text{commune} + \text{age} + \text{sex} + \text{smoke} + \text{SES} + \text{Cal. year} + \text{rain}(t_0) + \text{temperature}(t_0) + \text{dew point}(t_0) + \text{rain}(t_{-7 \text{ to } -1}) + \text{temperature}(t_{-7 \text{ to } -1}) + \text{dew point}(t_{-7 \text{ to } -1}) \quad (5)$$

This allows the data to choose the best fitting model. We refer to models (1)–(5) as the ‘simple’, ‘no weather’, ‘admission weather’, ‘past weather’, and ‘full’ models, respectively.

| Virus       | Chosen model      | AIC full | AIC past | AIC admission | AIC no weather | AIC simple |
|-------------|-------------------|----------|----------|---------------|----------------|------------|
| Influenza A | simple, (1)       | 541.09   | 535.67   | 548.29        | 547.68         | 535.39     |
| RSV         | past weather, (4) | 715.58   | 715.28   | 715.91        | 728.86         | 741.2      |
| HMPV        | no weather, (2)   | 294.98   | 289.47   | 292.1         | 286.98         | 293.6      |
| Influenza B | simple, (1)       | 419.8    | 417.66   | 421.46        | 417.51         | 393.43     |
| HPIV 1      | simple, (1)       | 275.06   | 270.49   | 271.04        | 267.35         | 250.66     |
| HPIV 2      | simple, (1)       | 117.46   | 121.62   | 115.1         | 116.91         | 87.65      |
| HPIV 3      | simple, (1)       | 313.63   | 317.22   | 310.36        | 312.81         | 296.79     |
| HPIV 4      | simple, (1)       | 84       | 78       | 78            | 72             | 35.5       |
| Rhinovirus  | adm. weather, (3) | 923.84   | 925.34   | 922.83        | 932.2          | 966.96     |
| Coronavirus | simple, (1)       | 84       | 78       | 78            | 72             | 35.05      |
| Adenovirus  | simple, (1)       | 315      | 309.57   | 311.51        | 309.32         | 296.26     |
| Bocavirus   | simple, (1)       | 131      | 130.53   | 127.84        | 126.85         | 107.16     |
| Any virus   | past weather, (4) | 1407.44  | 1402.92  | 1429.58       | 1434.33        | 1457.07    |

Table 2: **AIC of models used to assess seasonality.** Table shows AIC and chosen model (“simple”, “no weather”, “admission day weather”, “previous week model”, or “full” models as given in the main text) for each virus.

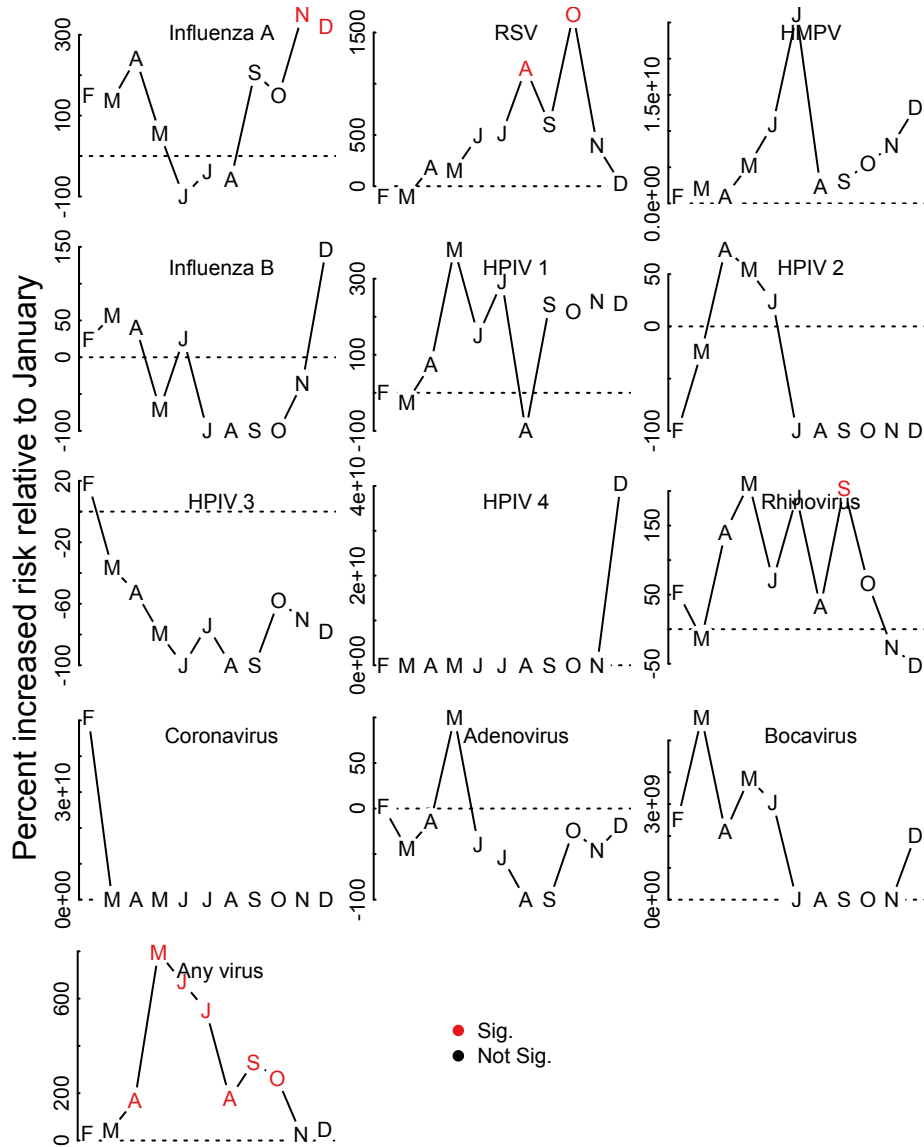

Figure S4: **Seasonality of common respiratory viruses in Nha Trang, Vietnam.** Figure shows logistic model-adjusted excess odds for month of year as compared to January, with model choice as given in Table 2. Red months indicates statistically significant deviations from January.

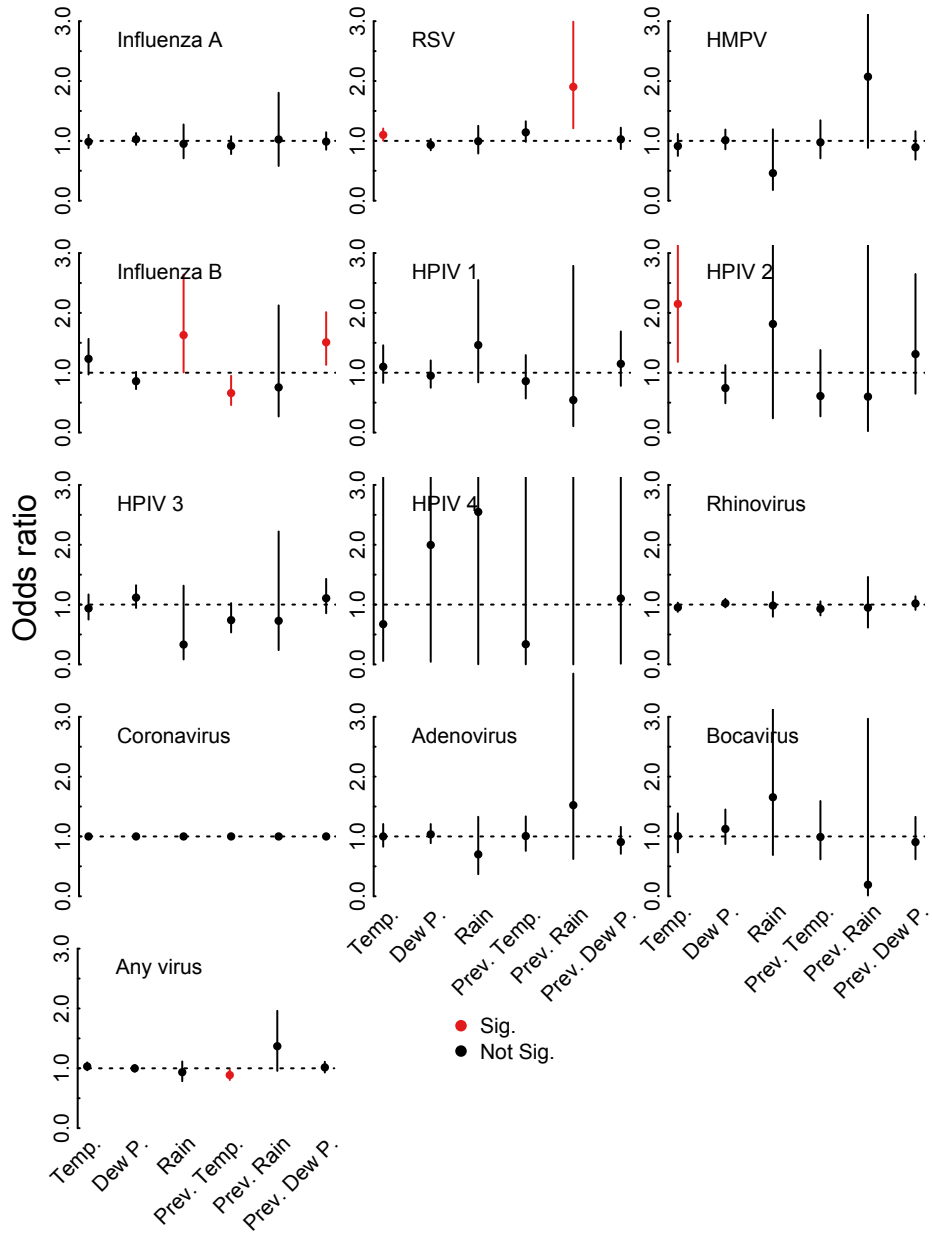

Figure S5: **Effects of weather on virus hospitalizations.** Figure shows model-adjusted odds ratios for the main six weather effects: admission day rainfall, temperature, and dew point, and the previous 7-day average rainfall, temperature, and dew point.

## Supplemental Cross-wavelets

Figure S6 shows the cross-wavelet transform of RSV and rainfall with non-significant arrows plotted for convenience. We see RSV leading rainfall by  $90^\circ$  at the one year period band.

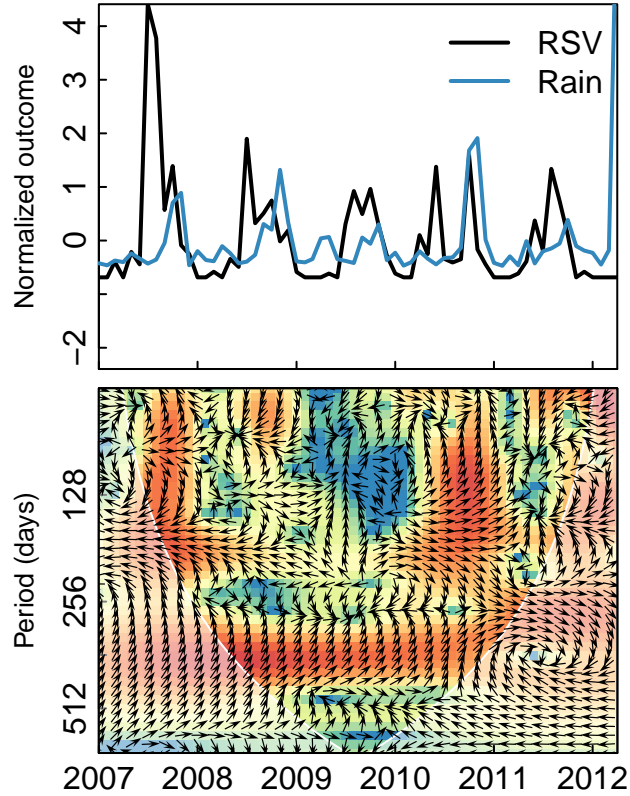

Figure S6: **Cross-wavelet transform of the z-standardized RSV and rainfall time series.** Figure shows the cross-wavelet of Adenovirus and rainfall, temperature, and dew point. The 5% significance level against red noise is shown as a thick contour. The relative phase relationship is shown as arrows (with in-phase pointing right, out-of-phase pointing left, and weather leading Adenovirus by  $90^\circ$  pointing straight down).



Figures S7–S17 show cross-wavelet transforms for the viruses not presented in the main text.

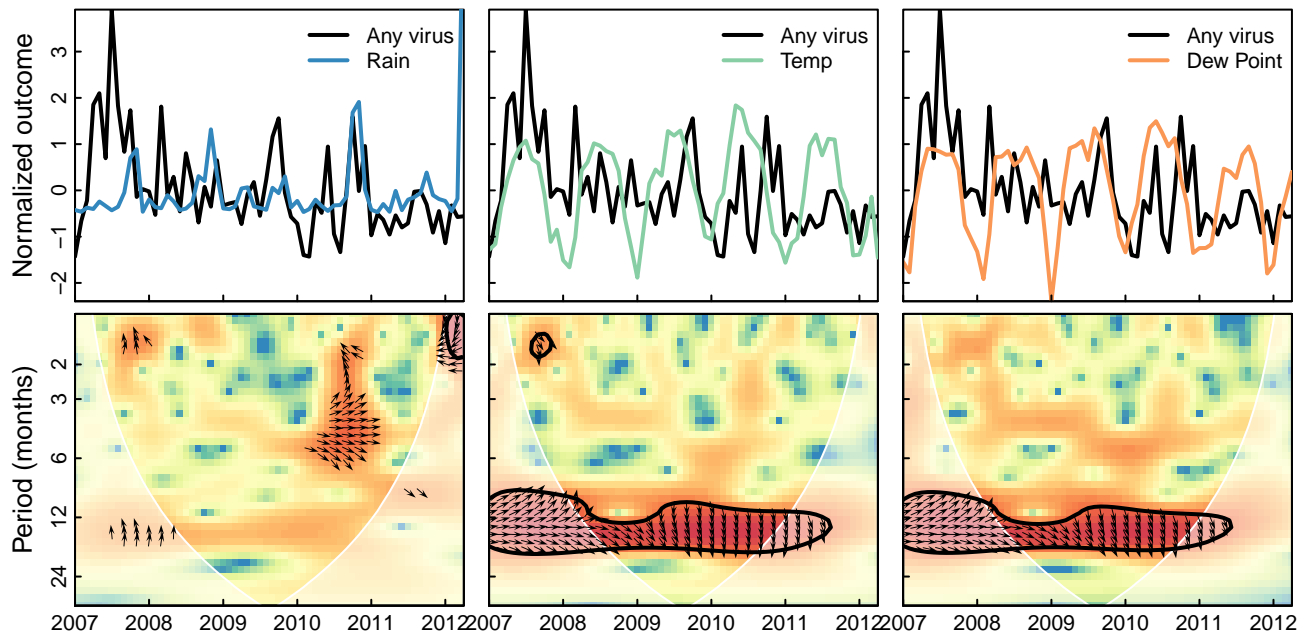

Figure S7: **Cross-wavelet transform of the z-standardized Any virus and weather time series.** Figure shows the cross-wavelet of Any virus and rainfall, temperature, and dew point. The 5% significance level against red noise is shown as a thick contour. The relative phase relationship is shown as arrows (with in-phase pointing right, out-of-phase pointing left, and weather leading Any virus by  $90^\circ$  pointing straight down).

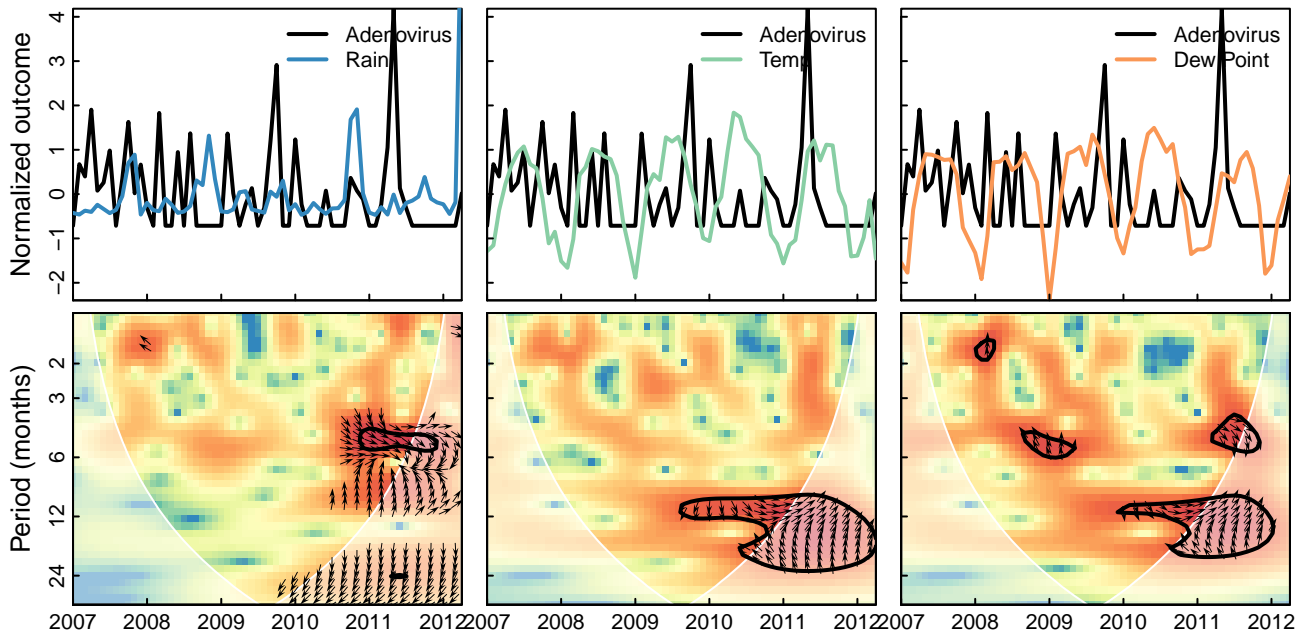

Figure S8: **Cross-wavelet transform of the z-standardized Adenovirus and weather time series.** Figure shows the cross-wavelet of RSV and rainfall, temperature, and dew point. The 5% significance level against red noise is shown as a thick contour. The relative phase relationship is shown as arrows (with in-phase pointing right, out-of-phase pointing left, and weather leading RSV by  $90^\circ$  pointing straight down).

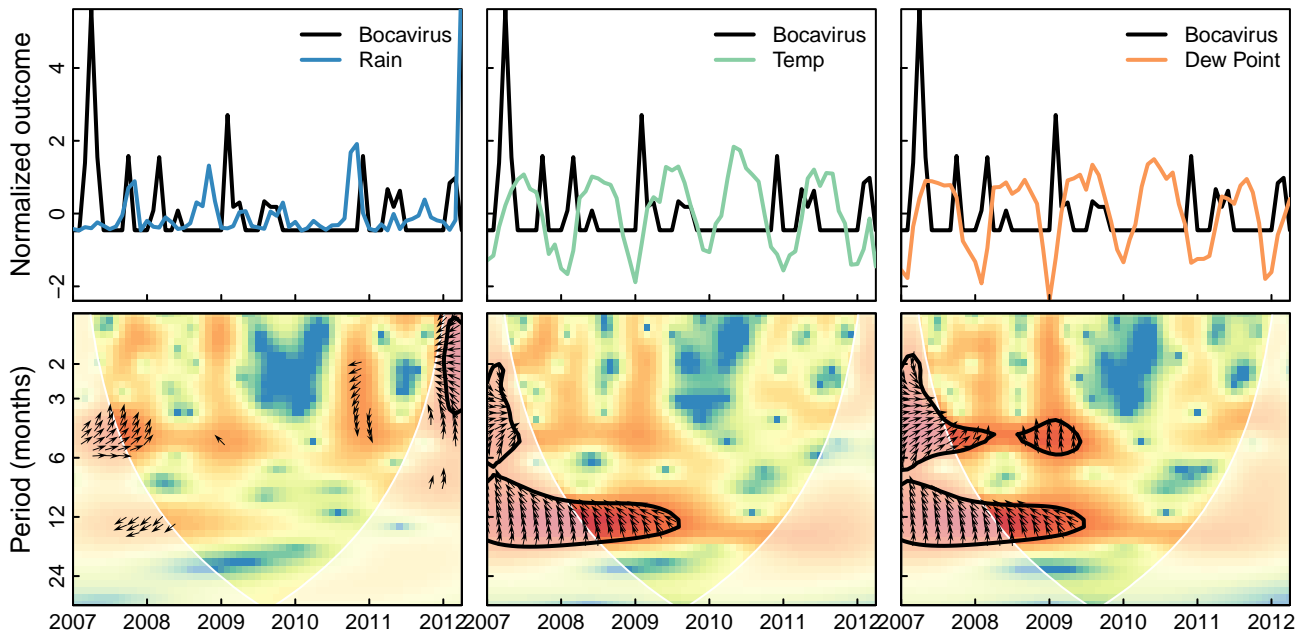

Figure S9: **Cross-wavelet transform of the z-standardized Bocavirus and weather time series.** Figure shows the cross-wavelet of Bocavirus and rainfall, temperature, and dew point. The 5% significance level against red noise is shown as a thick contour. The relative phase relationship is shown as arrows (with in-phase pointing right, out-of-phase pointing left, and weather leading Bocavirus by  $90^\circ$  pointing straight down).

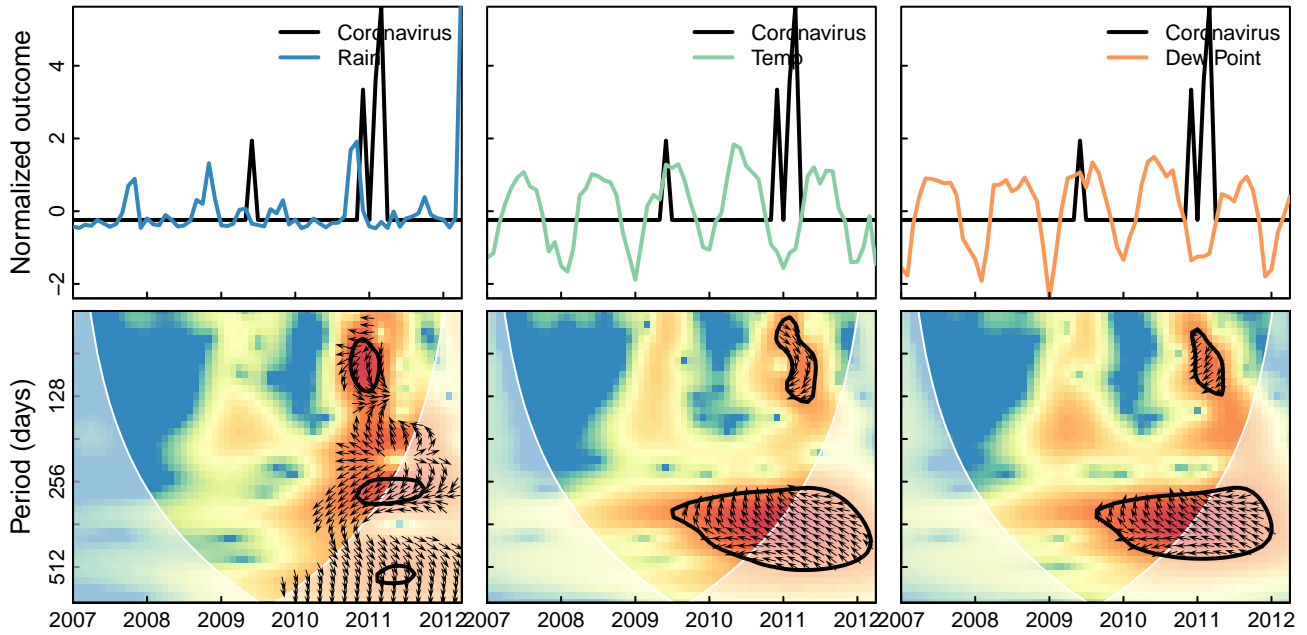

Figure S10: **Cross-wavelet transform of the z-standardized Coronavirus and weather time series.** Figure shows the cross-wavelet of Coronavirus and rainfall, temperature, and dew point. The 5% significance level against red noise is shown as a thick contour. The relative phase relationship is shown as arrows (with in-phase pointing right, out-of-phase pointing left, and weather leading Coronavirus by  $90^\circ$  pointing straight down).

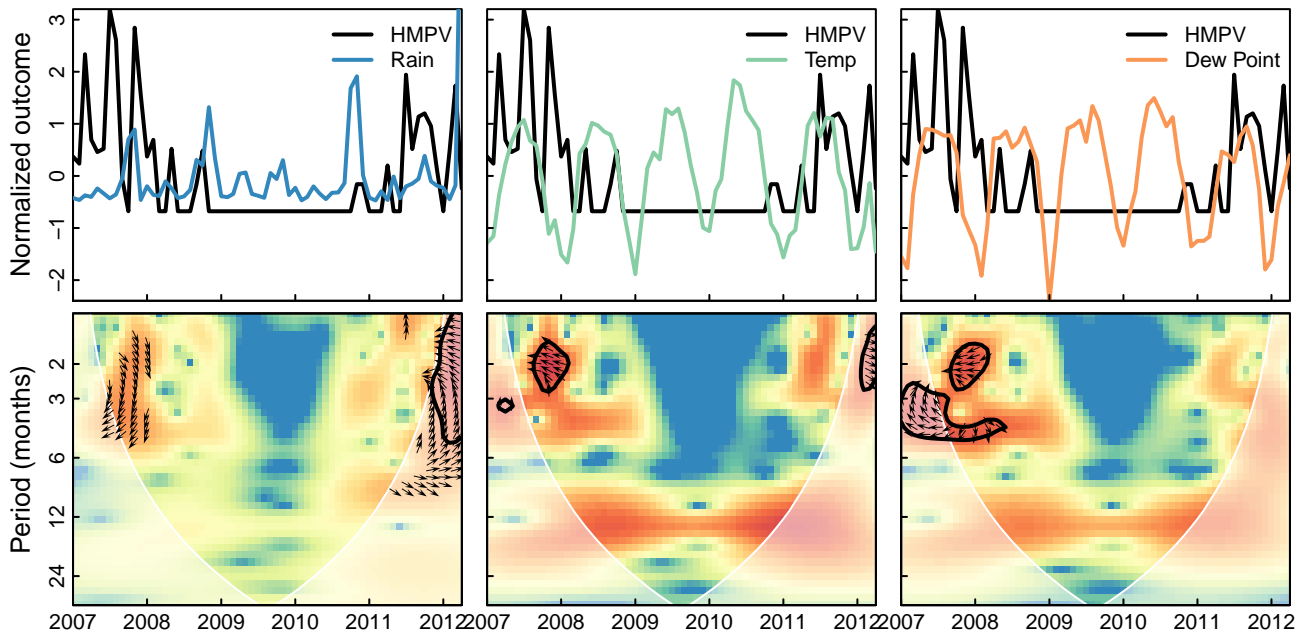

Figure S11: **Cross-wavelet transform of the z-standardized HMPV and weather time series.** Figure shows the cross-wavelet of HMPV and rainfall, temperature, and dew point. The 5% significance level against red noise is shown as a thick contour. The relative phase relationship is shown as arrows (with in-phase pointing right, out-of-phase pointing left, and weather leading HMPV by  $90^\circ$  pointing straight down).

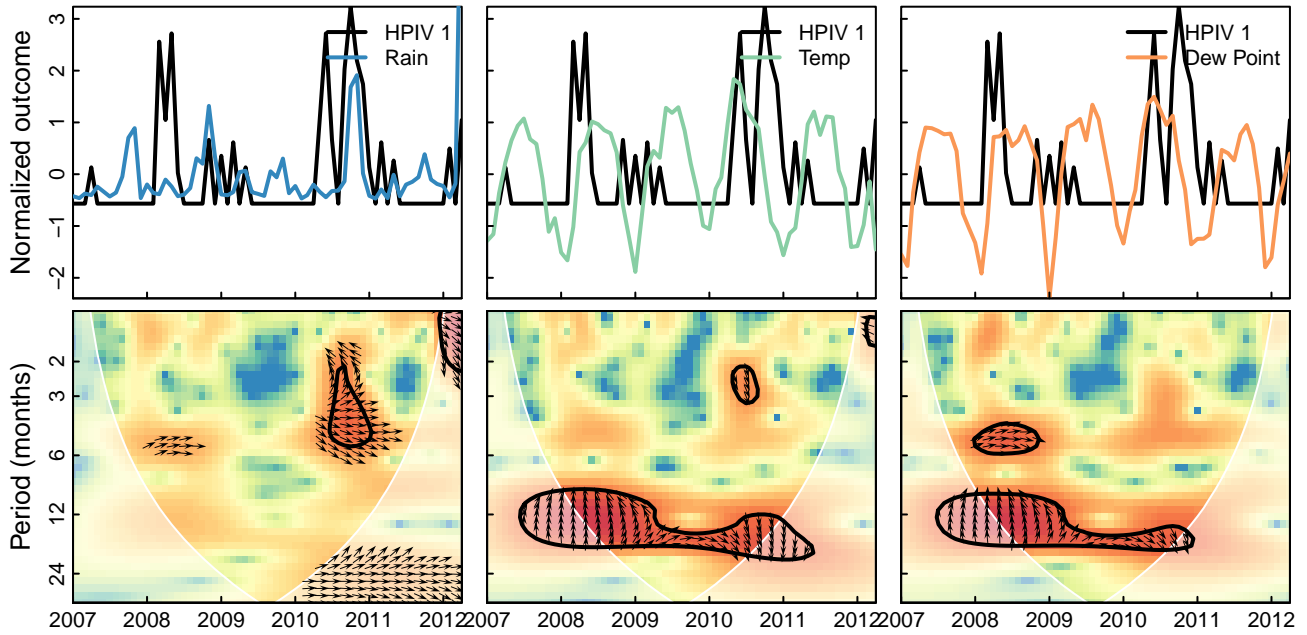

Figure S12: **Cross-wavelet transform of the z-standardized HPIV 1 and weather time series.** Figure shows the cross-wavelet of HPIV 1 and rainfall, temperature, and dew point. The 5% significance level against red noise is shown as a thick contour. The relative phase relationship is shown as arrows (with in-phase pointing right, out-of-phase pointing left, and weather leading HPIV 1 by  $90^\circ$  pointing straight down).

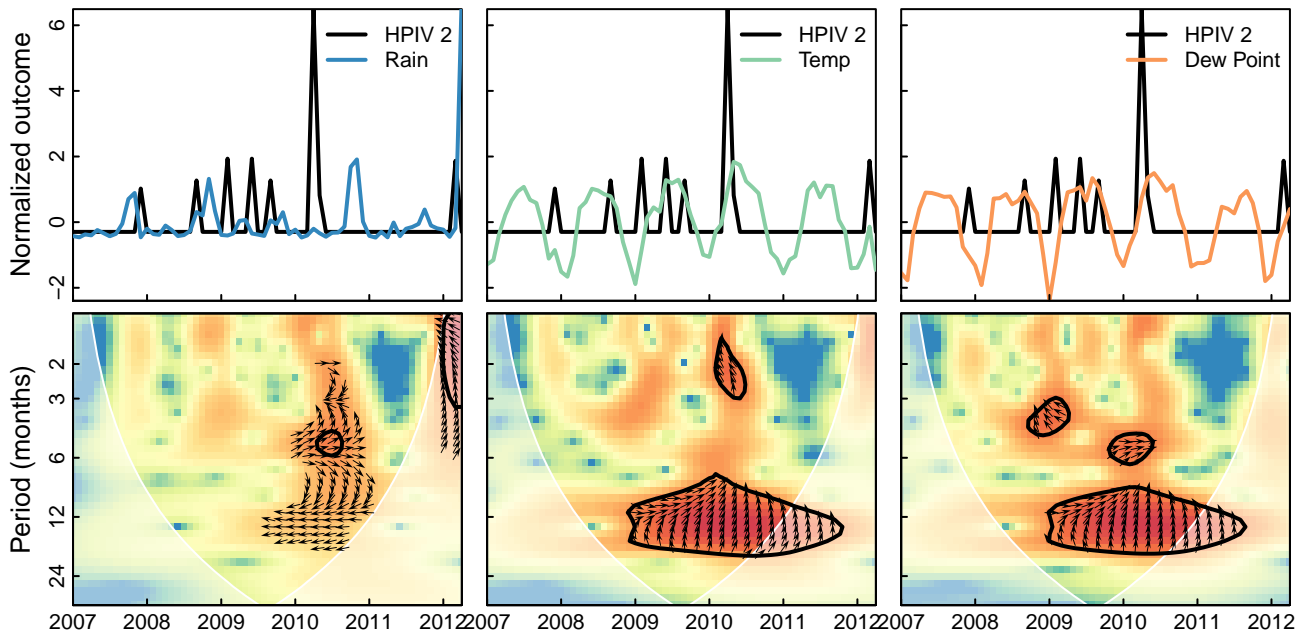

Figure S13: **Cross-wavelet transform of the z-standardized HPIV 2 and weather time series.** Figure shows the cross-wavelet of HPIV 2 and rainfall, temperature, and dew point. The 5% significance level against red noise is shown as a thick contour. The relative phase relationship is shown as arrows (with in-phase pointing right, out-of-phase pointing left, and weather leading HPIV 2 by  $90^\circ$  pointing straight down).

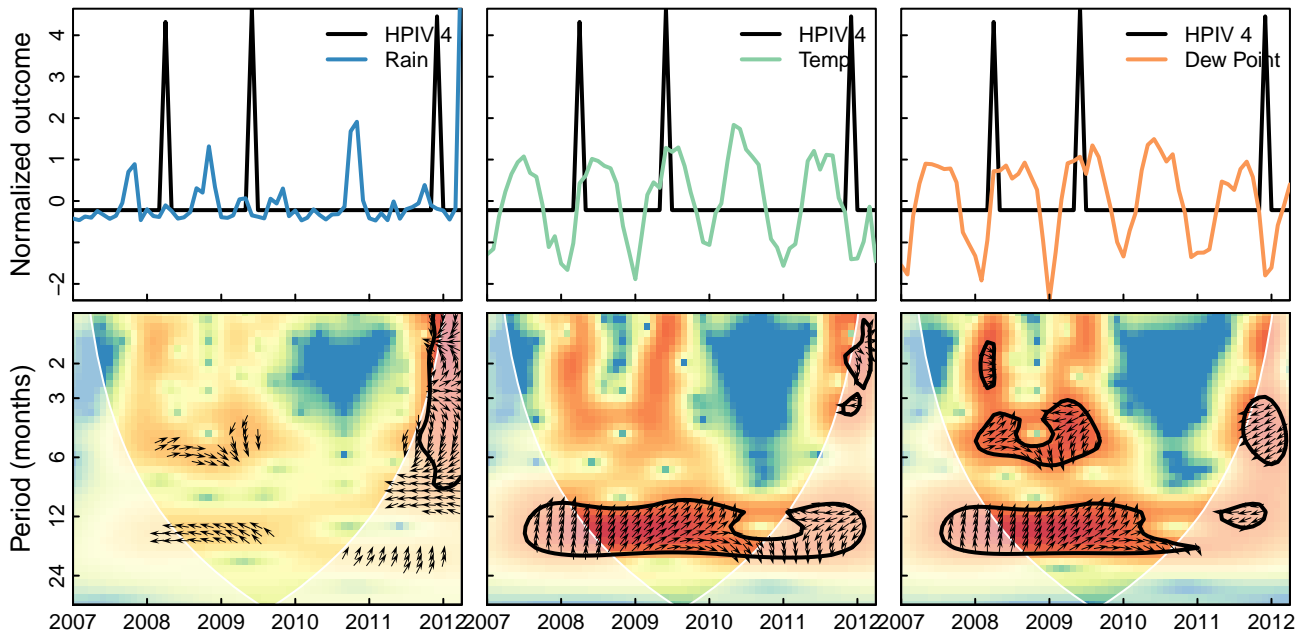

Figure S14: **Cross-wavelet transform of the z-standardized HPIV 4 and weather time series.** Figure shows the cross-wavelet of HPIV 4 and rainfall, temperature, and dew point. The 5% significance level against red noise is shown as a thick contour. The relative phase relationship is shown as arrows (with in-phase pointing right, out-of-phase pointing left, and weather leading HPIV 4 by 90° pointing straight down).

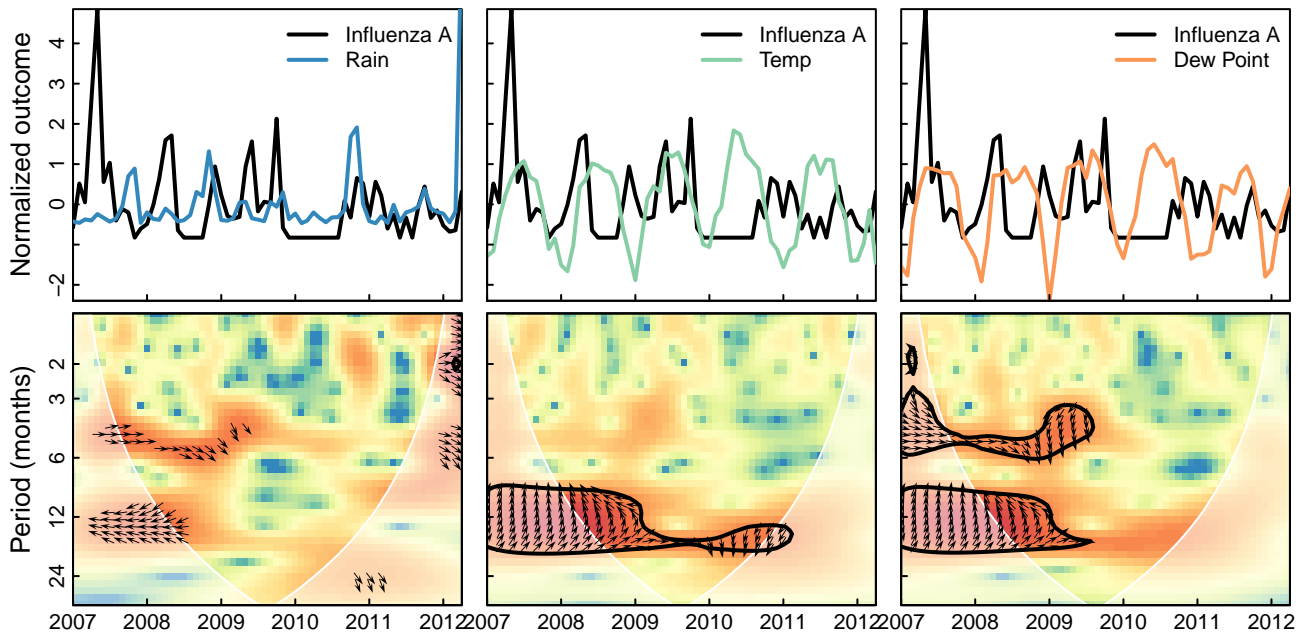

Figure S15: **Cross-wavelet transform of the z-standardized Influenza A and weather time series.** Figure shows the cross-wavelet of Influenza A and rainfall, temperature, and dew point. The 5% significance level against red noise is shown as a thick contour. The relative phase relationship is shown as arrows (with in-phase pointing right, out-of-phase pointing left, and weather leading Influenza A by 90° pointing straight down).

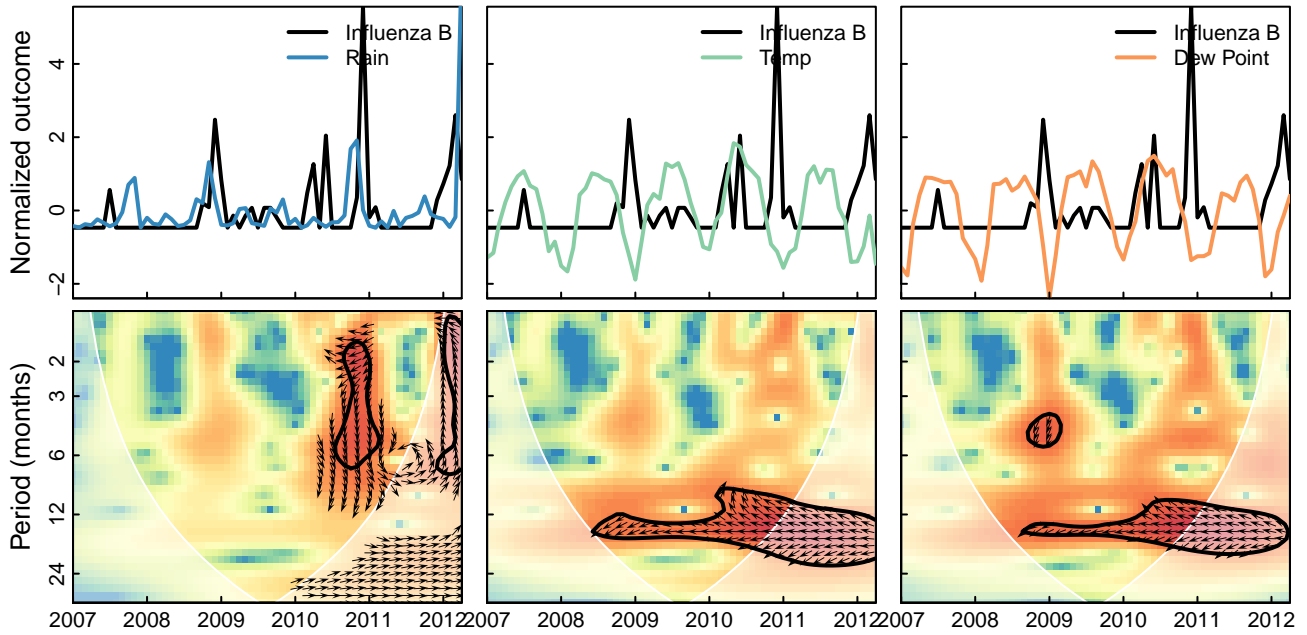

Figure S16: **Cross-wavelet transform of the z-standardized Influenza B and weather time series.** Figure shows the cross-wavelet of RSV and rainfall, temperature, and dew point. The 5% significance level against red noise is shown as a thick contour. The relative phase relationship is shown as arrows (with in-phase pointing right, out-of-phase pointing left, and weather leading Influenza B by  $90^\circ$  pointing straight down).

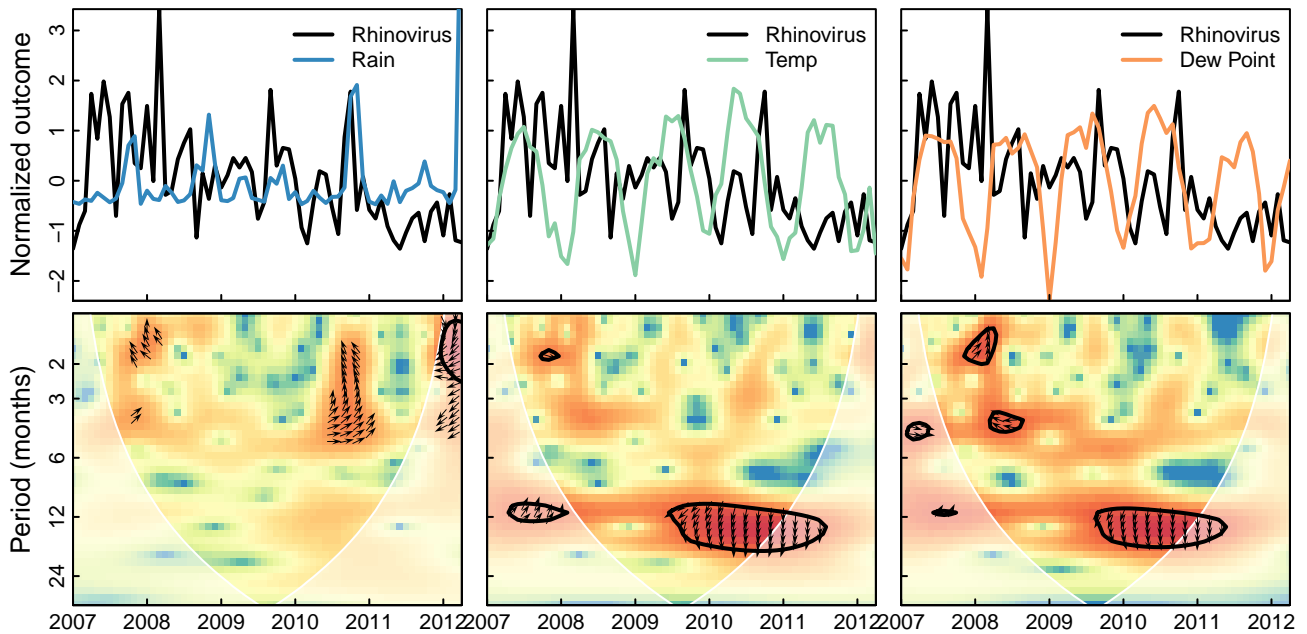

Figure S17: **Cross-wavelet transform of the z-standardized Rhinovirus and weather time series.** Figure shows the cross-wavelet of Rhinovirus and rainfall, temperature, and dew point. The 5% significance level against red noise is shown as a thick contour. The relative phase relationship is shown as arrows (with in-phase pointing right, out-of-phase pointing left, and weather leading Rhinovirus by  $90^\circ$  pointing straight down).
